# Supplementary material for: Metabolomic profiling to reveal the therapeutic potency of Posidonia oceanica nanoparticles in diabetic rats
Source: Royal Society of Chemistry journal article supplement (doi:10.1039/d0ra09606g), 2021-01-01
Supplement: d0ra09606g1.pdf [file d0ra09606g1.pdf]

**Suppl. Materials:**

**Metabolomic profiling to reveal the therapeutic potency of *posidonia oceanica*  
nano-particles in diabetic rats**

Naglaa M. Ammar<sup>a\*</sup>, Heba A. Hassan<sup>a</sup>, Mona A. Mohammed<sup>b</sup>, Ahmed Serag<sup>c\*</sup>, Sameh Hosam Abd El-Alim<sup>d</sup>, Heba Elmotasem<sup>d</sup>, Mohamed El Raey<sup>e</sup>, Abdel Nasser El Gendy<sup>b</sup>, Mansour Sobeh<sup>f</sup>, Abdel-Hamid Z. Abdel-Hamid<sup>a</sup>

<sup>a</sup>Therapeutic Chemistry Department, National Research Centre, 12622, Dokki, Giza, Egypt

<sup>b</sup>Department of Medicinal and Aromatic Plants Research, National Research Centre, Cairo, Egypt

<sup>c</sup>Pharmaceutical Analytical Chemistry Department, Faculty of Pharmacy, Al-Azhar University, 11751 Nasr City, Cairo, Egypt

<sup>d</sup>Pharmaceutical Technology Department, National Research centre, El-Buhouth St., Dokki, Cairo 1262, Egypt

<sup>e</sup>Department of Phytochemistry and Plant Systematics, National Research Center, Dokki, Cairo 12622, Egypt

<sup>f</sup>AgroBioSciences, Mohammed VI Polytechnic University, Lot 660–Hay MoulayRachid, Ben-Guerir 43150, Morocco

\*Corresponding authors:

E-mails: [ahmedserag777@azhar.edu.eg](mailto:ahmedserag777@azhar.edu.eg), [ahmedserag777@hotmail.com](mailto:ahmedserag777@hotmail.com) (Ahmed Serag)

[naglaaammar@yahoo.com](mailto:naglaaammar@yahoo.com) (Naglaa M. Ammar)

**Table S1.** GC-MS assignments of differential metabolites identified in the studied sera along with their calculated retention indices (RI).

| <b>Peak number</b> | <b>Name</b>                      | <b>Ontology</b>                     | <b>RI</b> | <b>m/z</b> |
|--------------------|----------------------------------|-------------------------------------|-----------|------------|
| <b>S1</b>          | Propane 1,2-diol (2 TMS)         | 1,2-diols                           | 988       | 117        |
| <b>S2</b>          | Butane-2,3-diol (2 TMS)          | 1,2-diols                           | 1017      | 117        |
| <b>S3</b>          | Lactic acid (2 TMS)              | Alpha hydroxy acids and derivatives | 1050      | 147        |
| <b>S4</b>          | Alanine (2 TMS)                  | Amino acids and derivatives         | 1093      | 116        |
| <b>S5</b>          | Beta-Hydroxybutyric acid (2 TMS) | Beta hydroxy acids and derivatives  | 1151      | 147        |
| <b>S6</b>          | Aminobutyric acid (2 TMS)        | Alpha-amino acids                   | 1162      | 130        |
| <b>S7</b>          | Valine (2 TMS)                   | Amino acids and derivatives         | 1204      | 144        |
| <b>S8</b>          | 2-hydroxyhexanoic acid (2 TMS)   | Medium-chain fatty acids            | 1223      | 103        |
| <b>S9</b>          | Leucine (2TMS)                   | Amino acids and derivatives         | 1260      | 158        |
| <b>S10</b>         | Isoleucine (2TMS)                | Amino acids and derivatives         | 1281      | 158        |
| <b>S11</b>         | Proline (2TMS)                   | Amino acids and derivatives         | 1288      | 142        |
| <b>S12</b>         | Uracil                           | Pyrimidones                         | 1336      | 99         |
| <b>S13</b>         | Serine (3TMS)                    | Amino acids and derivatives         | 1347      | 204        |
| <b>S14</b>         | Threitol (3TMS)                  | Sugar alcohols                      | 1485      | 147        |
| <b>S15</b>         | Methionine (2TMS)                | Amino acids and derivatives         | 1513      | 176        |
| <b>S16</b>         | GABA (3 TMS)                     | Gamma amino acids and derivatives   | 1516      | 174        |
| <b>S17</b>         | Phenylalanine (2TMS)             | Amino acids and derivatives         | 1618      | 218        |

|            |                                       |                             |      |     |
|------------|---------------------------------------|-----------------------------|------|-----|
| <b>S18</b> | 1,5-Anhydro-D-glucitol (5TMS; 1 MEOX) | Monosaccharides             | 1824 | 147 |
| <b>S19</b> | Glucose isomer (5 TMS; 1 MEOX)        | Hexoses                     | 1857 | 319 |
| <b>S20</b> | Beta-Glucose (5 TMS; 1 MEOX)          | Hexoses                     | 1868 | 73  |
| <b>S21</b> | Myo-inositol (6 TMS)                  | Cyclitols and derivatives   | 1909 | 217 |
| <b>S22</b> | Tyrosine (3 TMS)                      | Amino acids and derivatives | 1925 | 218 |
| <b>S23</b> | Glucosamine (5 TMS)                   | Amino saccharides           | 2119 | 203 |
| <b>S24</b> | Linoleic acid (1 TMS)                 | Long-chain fatty acids      | 2165 | 73  |
| <b>S25</b> | Oleic acid (1 TMS)                    | Long-chain fatty acids      | 2169 | 117 |

**Table S2.** Metabolites contributing for groups segregation were revealed from calculating the variable influence of projection (VIPs) along with their coefficients.

| Name                     | vip   | PLS-DA Coefficients           |         |                |                    |                            |
|--------------------------|-------|-------------------------------|---------|----------------|--------------------|----------------------------|
|                          |       | Butanol-extract treated group | Control | Diabetic group | Drug treated group | Nano-extract treated group |
| Beta-hydroxybutyric acid | 1.849 | 0.001                         | 0.075   | -0.049         | 0.052              | -0.079                     |
| Glucosamine              | 1.829 | 0.027                         | 0.066   | -0.022         | -0.007             | -0.064                     |
| Butane-2,3-diol          | 1.668 | 0.026                         | -0.076  | 0.043          | -0.028             | 0.035                      |
| Beta-Glucose             | 1.665 | 0.005                         | 0.042   | 0.010          | -0.072             | 0.015                      |
| 1,5-Anhydro-D-glucitol   | 1.629 | -0.020                        | 0.089   | -0.020         | -0.047             | -0.001                     |
| Aminobutyric acid        | 1.450 | 0.011                         | 0.059   | -0.034         | 0.032              | -0.067                     |
| Glucose isomer           | 1.377 | -0.036                        | 0.043   | -0.008         | -0.036             | 0.037                      |
| Myo-inositol             | 1.344 | 0.007                         | -0.037  | 0.034          | -0.050             | 0.046                      |
| GABA                     | 1.339 | -0.002                        | 0.076   | -0.026         | -0.012             | -0.036                     |

**Table S3.** Differential metabolites as revealed from combined univariate and multivariate analysis of *P. oceanica* butanol and nano-extracts therapeutic potentials on streptozotocin-induced type 2 diabetes mellitus (T2DM) rats.

| Metabolites             | T2DM vs control |             |        | T2DM vs butanol treated group |             |        | T2DM vs nano-extract treated group |             |        |
|-------------------------|-----------------|-------------|--------|-------------------------------|-------------|--------|------------------------------------|-------------|--------|
|                         | VIP             | Fold change | qvalue | VIP                           | Fold change | qvalue | VIP                                | Fold change | qvalue |
| Propane 1,2-diol        | 1.355           | 2.924       | 0.004  | 0.686                         | 1.434       | 0.110  | 0.403                              | 1.255       | 0.065  |
| Butane-2,3-diol         | 2.747           | 58.689      | 0.000  | 0.518                         | 1.467       | 0.241  | 1.872                              | 11.159      | 0.003  |
| Lactic acid             | 0.261           | 0.900       | 0.505  | 3.122                         | 5.351       | 0.018  | 0.425                              | 0.805       | 0.032  |
| Alanine                 | 1.590           | 3.143       | 0.036  | 0.555                         | 0.720       | 0.163  | 1.333                              | 3.107       | 0.001  |
| Valine                  | 0.969           | 2.000       | 0.054  | 0.679                         | 0.744       | 0.138  | 1.347                              | 3.557       | 0.001  |
| 2-hydroxy-hexanoic acid | 1.461           | 4.090       | 0.036  | 0.056                         | 1.096       | 0.474  | 1.079                              | 3.091       | 0.012  |
| Leucine                 | 1.296           | 2.591       | 0.004  | 0.722                         | 0.717       | 0.122  | 1.608                              | 5.346       | 0.001  |
| Isoleucine              | 0.865           | 1.711       | 0.071  | 1.047                         | 0.581       | 0.020  | 1.491                              | 4.369       | 0.001  |
| Proline                 | 1.897           | 4.767       | 0.023  | 1.082                         | 0.568       | 0.024  | 1.747                              | 6.955       | 0.001  |
| Uracil                  | 0.055           | 0.972       | 0.875  | 1.562                         | 0.311       | 0.004  | 0.632                              | 1.665       | 0.029  |
| Serine                  | 0.626           | 1.508       | 0.513  | 0.137                         | 0.993       | 0.440  | 1.320                              | 3.385       | 0.005  |
| Threitol                | 1.371           | 3.598       | 0.007  | 0.017                         | 1.097       | 0.457  | 1.296                              | 3.840       | 0.002  |
| Methionine              | 0.926           | 2.320       | 0.189  | 0.654                         | 0.725       | 0.167  | 1.493                              | 5.584       | 0.001  |
| GABA                    | 1.293           | 0.448       | 0.185  | 0.639                         | 1.050       | 0.250  | 0.485                              | 3.007       | 0.076  |
| Phenylalanine           | 0.852           | 2.264       | 0.311  | 0.150                         | 1.021       | 0.413  | 1.504                              | 5.956       | 0.002  |
| beta-Glucose            | 0.678           | 1.449       | 0.533  | 1.035                         | 0.577       | 0.032  | 1.669                              | 2.148       | 0.045  |
| Myo-inositol            | 1.510           | 6.143       | 0.021  | 0.186                         | 1.167       | 0.421  | 0.684                              | 2.111       | 0.055  |
| Tyrosine                | 0.789           | 2.751       | 0.495  | 0.441                         | 0.831       | 0.298  | 1.646                              | 8.639       | 0.003  |
| Glucosamine             | 0.801           | 2.343       | 0.723  | 2.256                         | 0.211       | 0.039  | 1.913                              | 5.344       | 0.011  |
| Linoleic acid           | 1.235           | 4.626       | 0.326  | 1.405                         | 0.404       | 0.073  | 1.302                              | 7.207       | 0.014  |
| oleic acid              | 0.029           | 1.719       | 0.860  | 1.080                         | 0.612       | 0.150  | 1.432                              | 12.113      | 0.012  |
